# Supplementary material
Source: PubMed Central journal article supplement (PMC2923358)
Supplement: fj.10-157040_1.pdf [file fj.10-157040_1.pdf]

## Supplementary Information

R. Rathinakumar and W. Wimley

### **“High-throughput Discovery of Broad-spectrum Peptide Antibiotics”**

**Table S1:** Comprehensive data table for all the peptides discussed in this work. Antimicrobial activity, membrane permeabilization, toxicity, hemolysis. Includes all control peptides and control samples.

**Table S2:** Data table for antibacterial activity at higher cell counts.

**Table S1.** Biological Activities of the peptides described in this work.

| Assay <sup>a</sup>   | Peptide <sup>b</sup>                   | Antimicrobial activity <sup>c</sup><br>MSC $\mu$ M (SE $\pm$ 0.1 to 2.0) |           |               |               | Hemolytic activity (%) <sup>c</sup> |             | Cytotoxic activity (%) <sup>c</sup> |
|----------------------|----------------------------------------|--------------------------------------------------------------------------|-----------|---------------|---------------|-------------------------------------|-------------|-------------------------------------|
|                      |                                        | E. coli                                                                  | S. aureus | P. aeruginosa | C. neoformans | Human RBC                           | Sheep RBC   | HEK293 <sup>d</sup>                 |
| MOS                  | *GRVY*                                 | 1.2                                                                      | 2.2       | 5.9           | 4.9           | 45 $\pm$ 6                          | 2 $\pm$ 2   | 3 $\pm$ 2                           |
|                      | *NATT*                                 | 1.6                                                                      | 3.3       | 4.0           | 4.9           | 13 $\pm$ 4                          | 0 $\pm$ 1   | 12 $\pm$ 2                          |
|                      | *TNTN*                                 | 1.8                                                                      | 2.4       | 2.9           | 4.3           | 8 $\pm$ 2                           | 2 $\pm$ 2   | 10 $\pm$ 2                          |
| SBS                  | *ARNY*                                 | 1.4                                                                      | 2.2       | 2.9           | 4.2           | 22 $\pm$ 5                          | 0 $\pm$ 1   | 11 $\pm$ 2                          |
|                      | *NRRV*                                 | 1.5                                                                      | 1.8       | 1.7           | 2.2           | 11 $\pm$ 6                          | 2 $\pm$ 2   | 35 $\pm$ 12                         |
|                      | *RNNY*                                 | 1.5                                                                      | 2.0       | 2.5           | 4.5           | 24 $\pm$ 7                          | 0 $\pm$ 1   | 82 $\pm$ 2                          |
| Vesicle-based Screen | *VDVY*                                 | 1.9                                                                      | 2.9       | 2.4           | 9.0           | 25 $\pm$ 2                          | 7 $\pm$ 2   | 15 $\pm$ 2                          |
|                      | *VAVY*                                 | 4.9                                                                      | 1.8       | 2.4           | 8.5           | 41 $\pm$ 4                          | 4 $\pm$ 2   | 6 $\pm$ 2                           |
|                      | *VAVR*                                 | 1.9                                                                      | 1.4       | 2.1           | 3.6           | 28 $\pm$ 3                          | 8 $\pm$ 3   | 8 $\pm$ 3                           |
|                      | *VAYR*                                 | 2.1                                                                      | 1.5       | 1.6           | 4.1           | 23 $\pm$ 5                          | 6 $\pm$ 1   | 2 $\pm$ 5                           |
|                      | *VRAA                                  | 1.5                                                                      | 3.3       | 1.3           | 2.7           | 11 $\pm$ 2                          | 6 $\pm$ 3   | 2 $\pm$ 6                           |
|                      | *ARVA                                  | 1.9                                                                      | 2.9       | 2.4           | 2.6           | 18 $\pm$ 2                          | 6 $\pm$ 2   | 3 $\pm$ 1                           |
|                      | *RVAV                                  | 1.4                                                                      | 2.4       | 1.7           | 5.4           | 28 $\pm$ 6                          | 5 $\pm$ 1   | 2 $\pm$ 3                           |
|                      | YTTG*                                  | 3.1                                                                      | 2.8       | 2.9           | 6.2           | 43 $\pm$ 5                          | 6 $\pm$ 3   | 1 $\pm$ 3                           |
|                      | ARYV                                   | 3.8                                                                      | 2.8       | 1.9           | 6.1           | 12 $\pm$ 2                          | 4 $\pm$ 2   | 3 $\pm$ 2                           |
|                      | VVRG                                   | 1.7                                                                      | 3.6       | 2.9           | 10.6          | 26 $\pm$ 3                          | 8 $\pm$ 3   | 9 $\pm$ 4                           |
| Controls             | *ARVA (dL <sub>10</sub> ) <sup>e</sup> | 9.7                                                                      | 8.8       | >10           | 6.5           | 4 $\pm$ 3                           | 10 $\pm$ 12 | 4 $\pm$ 1                           |
|                      | all D *ARVA <sup>f</sup>               | 1.3                                                                      | 2.8       | 2.0           | 6.5           | 12 $\pm$ 5                          | 1 $\pm$ 1   | ND                                  |
|                      | Indolicidin <sup>g</sup>               | 1.2                                                                      | 2.9       | 5.3           | 4.7           | 14 $\pm$ 2                          | 19 $\pm$ 5  | 2 $\pm$ 4                           |
|                      | Melittin <sup>h</sup>                  | 1.5                                                                      | 1.3       | 0.9           | 1.1           | 100 $\pm$ 12                        | 93 $\pm$ 7  | 93 $\pm$ 4                          |
|                      | PMSD <sup>i</sup>                      | >15                                                                      | >15       | >15           | >15           | 2 $\pm$ 1                           | 4 $\pm$ 1   | 4 $\pm$ 6                           |
|                      | Ampicilin                              | 0.4                                                                      | 0.1       | 4.4           | >15.0         | ND                                  | ND          | ND                                  |
|                      | Triton-X                               | ND                                                                       | ND        | ND            | ND            | 100                                 | 100         | 100                                 |

**Table S1 (continued)** Biological Activities of the peptides described in this work.

| Assay <sup>a</sup>   | Peptide <sup>b</sup>                   | Liposome leakage P:L 1:50 (%) <sup>c</sup> | Sytox Green Permeation into cells (%) <sup>c</sup> |          |               |                     |
|----------------------|----------------------------------------|--------------------------------------------|----------------------------------------------------|----------|---------------|---------------------|
|                      |                                        |                                            | E.coli                                             | S.aureus | C. neoformans | HEK293 <sup>d</sup> |
| MOS                  | *GRVY*                                 | 24 ± 9                                     | 55 ± 2                                             | 71 ± 8   | 5 ± 2         | 18 ± 1              |
|                      | *NATT*                                 | 3 ± 3                                      | 88 ± 6                                             | 79 ± 14  | 7 ± 1         | 1 ± 1               |
|                      | *TNTN*                                 | 5 ± 5                                      | 83 ± 4                                             | 84 ± 3   | 11 ± 1        | 22 ± 1              |
| SBS                  | *ARNY*                                 | 3 ± 2                                      | 74 ± 3                                             | 68 ± 4   | 20 ± 4        | 35 ± 1              |
|                      | *NRRV*                                 | 2 ± 2                                      | 81 ± 2                                             | 38 ± 4   | 69 ± 11       | 10 ± 1              |
|                      | *RNNY*                                 | 2 ± 1                                      | 104 ± 1                                            | 65 ± 3   | 43 ± 7        | 30 ± 1              |
| Vesicle-based Screen | *VDVY*                                 | 72 ± 20                                    | 61 ± 9                                             | 22 ± 12  | 3 ± 5         | 1 ± 10              |
|                      | *VAVY*                                 | 67 ± 20                                    | 6 ± 4                                              | 65 ± 25  | 1 ± 13        | 7 ± 4               |
|                      | *VAVR*                                 | 65 ± 20                                    | 91 ± 14                                            | 52 ± 6   | 12 ± 2        | 6 ± 4               |
|                      | *VAYR*                                 | 93 ± 15                                    | 94 ± 11                                            | 47 ± 11  | 16 ± 5        | 2 ± 13              |
|                      | *VRAA                                  | 25 ± 17                                    | 89 ± 14                                            | 71 ± 7   | 33 ± 5        | 3 ± 6               |
|                      | *ARVA                                  | 39 ± 25                                    | 80 ± 11                                            | 76 ± 2   | 32 ± 13       | 5 ± 3               |
|                      | *RVAV                                  | 69 ± 2                                     | 100 ± 10                                           | 72 ± 11  | 1 ± 8         | 7 ± 13              |
|                      | YTTG*                                  | 79 ± 6                                     | 17 ± 4                                             | 84 ± 5   | 10 ± 4        | 14 ± 24             |
|                      | ARYV                                   | 50 ± 21                                    | 24 ± 3                                             | 97 ± 12  | 9 ± 1         | 4 ± 1               |
|                      | VVRG                                   | 55 ± 22                                    | 16 ± 2                                             | 89 ± 12  | 4 ± 6         | 3 ± 2               |
| Controls             | *ARVA (dL <sub>10</sub> ) <sup>e</sup> | 1 ± 1                                      | 10 ± 8                                             | ND       | 0 ± 1         | 1 ± 1               |
|                      | all D *ARVA <sup>f</sup>               | 4 ± 4                                      | 93 ± 4                                             | 24 ± 10  | 2 ± 1         | 1 ± 1               |
|                      | Indolicidin <sup>g</sup>               | 24 ± 10                                    | 14 ± 5                                             | 23 ± 18  | 7 ± 2         | 4 ± 2               |
|                      | Melittin <sup>h</sup>                  | 98 ± 7                                     | 100                                                | 100      | 100           | 100                 |
|                      | PMSD <sup>i</sup>                      | ND                                         | 0                                                  | 3 ± 1    | 3 ± 1         | ND                  |
|                      | Ampicilin                              | ND                                         | 0                                                  | 0        | 0             | ND                  |
|                      | Triton-X                               | 100                                        | ND                                                 | ND       | ND            | ND                  |

<sup>a</sup>MOS: multiorganisms screen, see main text; SBS: stringent biological screen, see main text; Vesicle based screen: Tb/DPA leakage from Large Unilamellar vesicles composed of 90% palmitoyloleoylphosphatidylcholine (POPC) and 10% palmitoyloleoylphosphatidylglycerol (POPG).

<sup>b</sup>All peptides from the library are 9, 12 or 15 residues in length. The library has the form {RRG}WOLOLOLOY{RRG}-amide where the {RRG} terminal basic cassettes are randomly

present or absent and the O residues can be one of the following amino acids: NDTRGAVY. The W,L and C-terminal Y residues are fixed. The simplified peptide notation uses an asterisk for the terminal basic

cassette, when present, and identifies the only the four O-residues directly. For example the peptide RRGWRLVLALAY is referred to as \*RVAA.

<sup>c</sup> Experiments are described in detail in recent publications(1-4)

<sup>d</sup> Human embryonic kidney cell line 293.

<sup>e</sup> The peptide RRGWALRLVLAY in which the C-terminal-most L-leucine is replaced with a D-leucine.

<sup>f</sup> The peptide RRGWALRLVLAY in which the entire sequence is composed of D-amino acids

<sup>g</sup> The bovine neutrophin antimicrobial peptide indolicidin has the sequence ILPWKWPWWPWRR-amide.

<sup>h</sup> The Honey Bee venom peptide melittin is a 22-residue, alpha helical pore forming peptide which potently permeabilizes all lipid bilayer membranes, synthetic or biological. In all assays, 5 μM melittin had the same permeabilizing effect as membrane dissolution with detergents (e.g. Triton X-100).

<sup>i</sup> The perfringolysin membrane spanning domain (PMSD) is a sequence that contributes to a membrane permeabilizing beta barrel in the context of the whole multimeric perfringolysin O protein toxin. But the membrane-spanning sequence alone is inactive and we use it for a control peptide.

**Table S2. Antimicrobial activities at higher cell density.**

| Peptide     | E. coli                            | S. aureus | E. coli                            | S. aureus |
|-------------|------------------------------------|-----------|------------------------------------|-----------|
|             | <b>5 x 10<sup>5</sup> cells/ml</b> |           | <b>1 x 10<sup>3</sup> cells/ml</b> |           |
| *GRVY*      | 11.6                               | 9.4       | 1.2                                | 2.2       |
| *NATT*      | 3.3                                | 12.5      | 1.6                                | 3.3       |
| *TNTN*      | 3.6                                | 8.1       | 1.8                                | 2.4       |
|             |                                    |           |                                    |           |
| *ARNY*      | 3.4                                | 7.3       | 1.4                                | 2.2       |
| *NRRV*      | 2.0                                | 9.7       | 1.5                                | 1.8       |
| *RNNY*      | 5.9                                | 11.0      | 1.5                                | 2.0       |
|             |                                    |           |                                    |           |
| *VDVY*      | 6.5                                | 9.7       | 1.9                                | 2.9       |
| *VAVY*      | ND                                 | 9.7       | 4.9                                | 1.8       |
| *VAVR*      | 2.9                                | 2.0       | 1.9                                | 1.4       |
| *VAYR*      | ND                                 | 4.3       | 2.1                                | 1.5       |
| *VRAA       | 5.2                                | 9.7       | 1.5                                | 3.3       |
| *ARVA       | 2.4                                | 6.5       | 1.9                                | 2.9       |
| *RVAV       | 8.2                                | 4.3       | 1.4                                | 2.4       |
| YTTG*       | 6.5                                | 6.5       | 3.1                                | 2.8       |
| ARYV        | 9.7                                | 9.7       | 3.8                                | 2.8       |
| VVRG        | 9.7                                | 9.7       | 1.7                                | 3.6       |
|             |                                    |           |                                    |           |
| Indolicidin | 5.1                                | 9.7       | 1.2                                | 2.9       |
| Melittin    | 2.4                                | 1.3       | 1.5                                | 1.3       |
| PMSD        | >15                                | >15       | >15                                | >15       |
| Ampicilin   | 9.7                                | 1.3       | 0.4                                | 0.1       |

Hancock and colleagues have recently given guidelines for assessing antimicrobial activities of peptides(5). Among the guidelines was the use of 5x10<sup>5</sup> cells per ml rather than the 10<sup>3</sup> or 10<sup>4</sup> commonly employed. Previously we had found little or no difference between 10<sup>3</sup> or 10<sup>4</sup> cells/ml. In Table S2 we compare the antimicrobial activities of the selected antimicrobial peptides at low and high cell density. All peptides tested retain potent activity (MSC <

15 μM) at higher cell density, although MSC values are an average of 3 fold larger at 5x10<sup>5</sup> cells/ml compared to 1x10<sup>3</sup> cells/ml. Sequences and descriptions of the peptides are given above for Table S1. ND = not done. All MSC values have standard errors of 0.5 to 2.5 μM.

### Supplemental Reference List

1. Rathinakumar, R., Walkenhorst, W. F., & Wimley, W. C.(2009) Broad-spectrum Antimicrobial Peptides by Rational Combinatorial Design and High-throughput Screening: The Importance of Interfacial Activity *J. Am. Chem. Soc.* **131**, 7609-7617.
2. Rathinakumar, R. & Wimley, W. C.(2008) Biomolecular engineering by combinatorial design and high-throughput screening: small, soluble peptides that permeabilize membranes *J. Am. Chem. Soc.* **130**, 9849-9858.
3. Rausch, J. M., Marks, J. R., Rathinakumar, R., & Wimley, W. C.(2007) Beta-sheet pore-forming peptides selected from a rational combinatorial library: mechanism of pore formation in lipid vesicles and activity in biological membranes *Biochemistry* **46**, 12124-12139.
4. Rausch, J. M., Marks, J. R., & Wimley, W. C.(2005) Rational combinatorial design of pore-forming beta-sheet peptides *Proc. Natl. Acad. Sci. U. S. A* **102**, 10511-10515.
5. Wiegand, I., Hilpert, K., & Hancock, R. E.(2008) Agar and broth dilution methods to determine the minimal inhibitory concentration (MIC) of antimicrobial substances *Nat. Protoc.* **3**, 163-175.
